# Supplementary material for: Particle-Bound Mercury Characterization in the Central Italian Herbarium of the Natural History Museum of the University of Florence (Italy)
Source: MDPI journal article supplement (doi:10.3390/toxics9060141), 2021-06-15
Supplement: s1 [file s1]

## Article

# Supplementary Materials: Particle-Bound Mercury Characterization in the Central Italian Herbarium of the Natural History Museum of the University of Florence (Italy)

Francesco Ciani, Laura Chiarantini, Pilario Costagliola and Valentina Rimondi

**Table S1.** Summary of the parameters employed for dust ingestion ( $ADD_{ing}$ ), inhalation ( $ADD_{inh}$ ), and dermal absorption ( $ADD_{derm}$ ) calculation.

| Parameter                                        | Value    | Reference                    |
|--------------------------------------------------|----------|------------------------------|
| $C_{Hg}$ (Hg concentration – $mg\ kg^{-1}$ )     | 4 - 691  | This study                   |
| IR (ingestion rate – $mg\ day^{-1}$ )            | 30 - 60  | US EPA (2017)                |
| EF (exposure frequency – $days\ year^{-1}$ )     | 223      | This study                   |
| ED (exposure duration - years)                   | 24       | US EPA (2004)                |
| RBA (relative bioavailability)                   | 1        | US EPA (2007)                |
|                                                  | 0.05     | Welfringer and Zagury (2009) |
| CF (conversion factor – $kg\ mg^{-1}$ )          | 1E-06    | US EPA (2002)                |
| AT (average time)                                | 8760     | US EPA (2002)                |
| BW (average body weight)                         | 80       | US EPA (2011)                |
| InhR (inhalation rate - $m^3\ day^{-1}$ )        | 15.85    | US EPA (2017)                |
| PEF (particle emission factor - $m^3\ kg^{-1}$ ) | 1.36E+09 | US EPA (2002)                |
| SA (skin area- $cm^2$ )*                         | 1070     | US EPA (2011)                |
| AF (skin adherence factor – $mg\ cm^{-2}$ )      | 7.0E-02  | US EPA (2002)                |
| ABSd (dermal absorption factor - $mg\ cm^{-2}$ ) | 3.0E-02  | US EPA (2004)                |
| Rfd_ing (reference dose for ingestion)           | 1.6E-04  | RAIS (2020)                  |
| Rfd_inh (reference dose for inhalation)          | 3.0E-04  | RAIS (2020)                  |
| Rfd_derm (reference dose for dermal absorption)  | 2.1E-05  | RAIS (2020)                  |

\* hands only.

**Table S2.** Results of the hazard quotients (HQ) for the three different exposure pathways (ingestion, inhalation and dermal absorption) and the calculated hazard index (HI) for the dust samples collected in the *Central Italian Herbarium* and in the Geomineralogy library (the background site) of the University of Florence. Four different scenarios have been outlined, based on the ingestion rate (IR) suggested by US EPA (general population central tendency and 90<sup>th</sup> upper percentile) and the relative bioavailability (total = 1 or partial = 0.05, based on Welfringer, B. and Zagury, G. J., 2009) of the Hg compounds.

| Central Italian Herbarium |                                                                                    |                                        |                                            | Geomineralogy Library                |                                       |                                           |       |
|---------------------------|------------------------------------------------------------------------------------|----------------------------------------|--------------------------------------------|--------------------------------------|---------------------------------------|-------------------------------------------|-------|
|                           | min [Hg]<br>(151 mg kg <sup>-1</sup> )                                             | max [Hg]<br>(531 mg kg <sup>-1</sup> ) | average [Hg]<br>(329 mg kg <sup>-1</sup> ) | min [Hg]<br>(4 mg kg <sup>-1</sup> ) | max [Hg]<br>(21 mg kg <sup>-1</sup> ) | average [Hg]<br>(13 mg kg <sup>-1</sup> ) |       |
|                           | (St. Err. 65 mg/Kg)                                                                |                                        |                                            | (St. Err. 6 mg/Kg)                   |                                       |                                           |       |
| RBA = 1                   | IR= 30 mg day <sup>-1</sup> (general population central tendency)                  |                                        |                                            |                                      |                                       |                                           |       |
|                           | HQ <sub>ing</sub>                                                                  | 0.2                                    | 0.8                                        | 0.4                                  | < 0.1                                 | < 0.1                                     | < 0.1 |
|                           | HQ <sub>inh</sub>                                                                  | < 0.1                                  | < 0.1                                      | < 0.1                                | < 0.1                                 | < 0.1                                     | < 0.1 |
|                           | HQ <sub>derm</sub>                                                                 | 0.1                                    | 0.4                                        | 0.3                                  | < 0.1                                 | < 0.1                                     | < 0.1 |
|                           | HI                                                                                 | 0.3                                    | 1.2                                        | 0.7                                  | < 0.1                                 | < 0.1                                     | < 0.1 |
|                           | IR= 60 mg day <sup>-1</sup> (general population 90 <sup>th</sup> upper percentile) |                                        |                                            |                                      |                                       |                                           |       |
|                           | HQ <sub>ing</sub>                                                                  | 0.4                                    | 1.5                                        | 0.9                                  | < 0.1                                 | 0.1                                       | < 0.1 |
|                           | HQ <sub>inh</sub>                                                                  | < 0.1                                  | < 0.1                                      | < 0.1                                | < 0.1                                 | < 0.1                                     | < 0.1 |
|                           | HQ <sub>derm</sub>                                                                 | 0.1                                    | 0.4                                        | 0.3                                  | < 0.1                                 | < 0.1                                     | < 0.1 |
|                           | HI                                                                                 | 0.6                                    | 2.0                                        | 1.2                                  | < 0.1                                 | 0.1                                       | < 0.1 |
| RBA = 0.05                | IR= 30 mg day <sup>-1</sup> (general population central tendency)                  |                                        |                                            |                                      |                                       |                                           |       |
|                           | HQ <sub>ing</sub>                                                                  | < 0.1                                  | < 0.1                                      | < 0.1                                | < 0.1                                 | < 0.1                                     | < 0.1 |
|                           | HQ <sub>inh</sub>                                                                  | < 0.1                                  | < 0.1                                      | < 0.1                                | < 0.1                                 | < 0.1                                     | < 0.1 |
|                           | HQ <sub>derm</sub>                                                                 | 0.1                                    | 0.4                                        | 0.3                                  | < 0.1                                 | < 0.1                                     | < 0.1 |
|                           | HI                                                                                 | 0.1                                    | 0.5                                        | 0.3                                  | < 0.1                                 | < 0.1                                     | < 0.1 |
|                           | IR= 60 mg day <sup>-1</sup> (general population 90 <sup>th</sup> upper percentile) |                                        |                                            |                                      |                                       |                                           |       |
|                           | HQ <sub>ing</sub>                                                                  | < 0.1                                  | 0.1                                        | < 0.1                                | < 0.1                                 | < 0.1                                     | < 0.1 |
|                           | HQ <sub>inh</sub>                                                                  | < 0.1                                  | < 0.1                                      | < 0.1                                | < 0.1                                 | < 0.1                                     | < 0.1 |
|                           | HQ <sub>derm</sub>                                                                 | 0.1                                    | 0.4                                        | 0.3                                  | < 0.1                                 | < 0.1                                     | < 0.1 |
|                           | HI                                                                                 | 0.1                                    | 0.5                                        | 0.3                                  | < 0.1                                 | < 0.1                                     | < 0.1 |

**Table S3.** Results of the dimensional analysis of the other heavy metals found in the samples dust of both years.

| 2018<br>dust | Zn              | ECD (µm) |       |         | Ba           | ECD (µm) |       |         | Pb              | ECD (µm) |      |         |
|--------------|-----------------|----------|-------|---------|--------------|----------|-------|---------|-----------------|----------|------|---------|
|              | Particles<br>n. | min      | max   | average | Particles n. | min      | max   | average | Particles<br>n. | min      | max  | average |
| W-OD         | 251             | 0.15     | 11.96 | 0.79    | 605          | 0.15     | 11.96 | 0.86    | 242             | 0.15     | 3.64 | 0.74    |
| W-AD         | 69              | 0.15     | 4.20  | 0.69    | 315          | 0.15     | 8.14  | 0.68    | 318             | 0.15     | 10.8 | 0.63    |
| W-ND         | 64              | 0.15     | 1.61  | 0.57    | 185          | 0.15     | 10.04 | 0.80    | 26              | 0.15     | 1.91 | 0.57    |
| B-OD         | 272             | 0.29     | 2.63  | 0.72    | 192          | 0.29     | 2.62  | 0.79    | 93              | 0.29     | 2.62 | 0.81    |
| B-AD         | 439             | 0.29     | 2.55  | 0.85    | 550          | 0.29     | 2.65  | 0.86    | 788             | 0.29     | 2.50 | 0.78    |
| B-ND         | 248             | 0.29     | 2.60  | 0.82    | 121          | 0.29     | 2.56  | 0.79    | 20              | 0.29     | 2.1  | 0.92    |

|                  |                     |                 |            |                |                     |                 |            |                |                     |                 |            |                |
|------------------|---------------------|-----------------|------------|----------------|---------------------|-----------------|------------|----------------|---------------------|-----------------|------------|----------------|
| G-OD             | 61                  | 0.29            | 1.97       | 0.89           | 66                  | 0.29            | 2.35       | 0.85           | 17                  | 0.29            | 2.35       | 0.8            |
| G-AD             | 129                 | 0.29            | 2.65       | 0.8            | 58                  | 0.29            | 2.58       | 0.90           | 26                  | 0.29            | 1.9        | 0.8            |
| G-ND             | 4                   | 0.42            | 1.47       | 0.78           | 9                   | 0.51            | 2.63       | 1.11           | 1                   | 1.02            | 1.02       | 1.02           |
| W-W              | n.a.                | n.a.            | n.a.       | n.a.           | n.a.                | n.a.            | n.a.       | n.a.           | n.a.                | n.a.            | n.a.       | n.a.           |
| W-P              | n.a.                | n.a.            | n.a.       | n.a.           | n.a.                | n.a.            | n.a.       | n.a.           | n.a.                | n.a.            | n.a.       | n.a.           |
| B-P              | n.a.                | n.a.            | n.a.       | n.a.           | n.a.                | n.a.            | n.a.       | n.a.           | n.a.                | n.a.            | n.a.       | n.a.           |
| G-P              | n.a.                | n.a.            | n.a.       | n.a.           | n.a.                | n.a.            | n.a.       | n.a.           | n.a.                | n.a.            | n.a.       | n.a.           |
| <b>2020 Dust</b> | <b>Zn</b>           | <b>ECD (µm)</b> |            |                | <b>Ba</b>           | <b>ECD (µm)</b> |            |                | <b>Pb</b>           | <b>ECD (µm)</b> |            |                |
|                  | <b>Particles n.</b> | <b>min</b>      | <b>max</b> | <b>average</b> | <b>Particles n.</b> | <b>min</b>      | <b>max</b> | <b>average</b> | <b>Particles n.</b> | <b>min</b>      | <b>max</b> | <b>average</b> |
| W-OD             | 3                   | 0.29            | 0.51       | 0.40           | 3                   | 0.29            | 0.51       | 0.40           | 10                  | 0.29            | 1.25       | 0.78           |
| W-AD             | 37                  | 0.29            | 1.97       | 0.69           | -                   | -               | -          | -              | 11                  | 0.29            | 1.66       | 0.74           |
| W-ND             | 205                 | 0.15            | 1.70       | 0.40           | 280                 | 0.15            | 2.43       | 0.44           | 4                   | 0.15            | 0.47       | 0.25           |
| B-OD             | 153                 | 0.29            | 4.31       | 0.84           | 158                 | 0.29            | 4.32       | 0.91           | 31                  | 0.42            | 5.66       | 1.36           |
| B-AD             | 15                  | 0.29            | 1.74       | 0.74           | 31                  | 0.29            | 1.93       | 0.61           | 79                  | 0.29            | 1.28       | 0.62           |
| B-ND             | 2                   | 0.41            | 0.65       | 0.53           | 4                   | 0.41            | 1.25       | 0.83           | -                   | -               | -          | -              |
| G-OD             | -                   | -               | -          | -              | 2                   | 0.29            | 4.25       | 2.28           | -                   | -               | -          | -              |
| G-AD             | -                   | -               | -          | -              | 1                   | 0.51            | 0.51       | 0.51           | -                   | -               | -          | -              |
| G-ND             | -                   | -               | -          | -              | -                   | -               | -          | -              | -                   | -               | -          | -              |
| W-W              | 946                 | 0.06            | 4.10       | 0.45           | 930                 | 0.06            | 4.10       | 0.45           | 8                   | 0.19            | 0.97       | 0.50           |
| W-P              | 2                   | 0.97            | 1.01       | 0.99           | 6                   | 0.72            | 1.28       | 0.93           | -                   | -               | -          | -              |
| B-P              | -                   | -               | -          | -              | -                   | -               | -          | -              | -                   | -               | -          | -              |
| G-P              | -                   | -               | -          | -              | 1                   | 0.14            | 0.42       | 0.28           | -                   | -               | -          | -              |
